# Supplementary material
Source: ML conference proceedings conference paper supplement (https://openaccess.thecvf.com/content/CVPR2023/html/Chen_Viewpoint_Equivariance_for_CVPR_2023_paper.html)
Supplement: Supplementary file 1 [file Chen_Viewpoint_Equivariance_for_CVPR_2023_supplemental.pdf]

## A. Implementation details

**VEDet model.** We use three different backbones to report performance on NuScenes: ResNet-50 and ResNet-101 [3] are initialized from the ImageNet-pretrained weights hosted on OpenMMLab [2]; VoVNetV2-99 [5] is initialized from the depth-pretrained weights released by [9]. The image features and geometric positional encodings have dimension  $C = 256$ , and are added element-wise as the keys to the transformer decoder, which has  $L = 6$  transformer layers. In the transformer layers, we use multi-head attention with 8 heads, dropout rate 0.1 on the residual connection, and 2048 hidden dimensions in the feed-forward network. To predict the classification scores, we use a single linear projection from 256-dim queries to 10-dim class scores; for predicting the 3D box attributes, we use a 2-layer MLP with [512, 512] hidden dimensions interleaved with ReLU activations. The classification and regression heads are both shared across the 6 transformer layers.

**Learnable geometry mapping.** For the MLP in the learnable geometry mapping, used to make both geometric positional encoding and object queries, we use 1 hidden layer with 1920 dimensions, followed by a ReLU activation and a final projection to  $C = 256$  dimensions. Therefore, given Fourier bands  $k = 64$ , the dimensions go through the following changes:  $d_0 \rightarrow_{\text{Fourier}} 1280 \rightarrow_{\text{hidden}} 1920 \rightarrow_{\text{proj}} 256$ , where  $d_0 = 10$  for both perspective geometry of an image feature  $[\mathbf{r}_{(u_i, v_i)}, \bar{\mathbf{q}}, \mathbf{t}]$  and query geometry  $[\mathbf{c}_j^v, \bar{\mathbf{q}}^v, \mathbf{t}^v]$ .

**Query points.** We use 900 learnable 3D query points in all experiments. We follow [10] to use object ranges  $[-51.2m, -51.2m, -5.0m, 51.2m, 51.2m, 3.0m]$  in XYZ axes of the global BEV space around the vehicle. The query points are normalized to  $[0, 1]$  by a sigmoid operation and scaled by their range. The predictions of box center offsets are added to the points before the sigmoid operation.

**Virtual view sampling.** During training, the range we use to uniformly sample the translation for the virtual query views is  $[-0.6m, -1.0m, -0.3m, 0.6m, 1.0m, 0m]$  in XYZ axes. We uniformly sample the yaw angle to be between  $[0, 2\pi]$ .

**Temporal modeling.** In the full-version VEDet we concatenate 2 temporal frames at the token dimension. Following [4, 7], we randomly sample one frame from the past [3, 27] frames during training, and use the past 15-th frame during inference. The time interval between consecutive frames is roughly 0.083s.

**Optimization.** During training, the loss weights we use are  $\lambda_{cls} = 2.0$  and  $\lambda_{reg} = 0.25$  following [6, 10]. We use the AdamW optimizer [8] with weight decay 0.01. The learning rate is linearly warmed up in the first 500 iterations from  $6.77e^{-5}$  ( $\frac{1}{3}$  of initial learning rate) to  $2e^{-4}$ . The

learning rate of the pretrained backbone is multiplied by 0.1 compared to all other components, that are trained from scratch. Checkpointing [1] is adopted during training to save GPU memory, bringing the training time of the full-version VEDet (2 frames,  $640 \times 1600$  images,  $V = 4$ ) to 36 hours on 8 A100 GPUs, for 24 epochs on NuScenes.

**Data augmentation.** We use data augmentations following [6], in the order shown below:

- **Resize.** The original images are resized keeping the aspect ratio. The resize factor is sampled uniformly from  $[0.564, 0.8]$  for  $384 \times 1056$  images,  $[0.79, 1.1]$  for  $512 \times 1408$  images, and  $[0.94, 1.25]$  for  $640 \times 1600$  images.
- **Crop.** Given a crop size  $H \times W$  and an intermediate image size  $H' \times W'$  after the resizing, the top area  $[0, H' - H]$  is cropped to meet the final height  $H$ . The left limit of the cropping box is uniformly sampled from  $[0, W' - W]$ .
- **Horizontal flip.** With a 50% probability, we flip all  $N$  images at the same time, alongside the 3D box annotations. The camera poses and intrinsics are transformed accordingly to reflect the flipping. Concretely, the X coordinate of the camera translation and yaw angle are flipped, while the principal point in the intrinsic matrix has the X-coordinate flipped.
- **Global rotation.** Without changing the images, the camera poses and 3D box annotations are rotated around the Z axis of the global BEV space. The angle is uniformly sampled from  $[-22.5^\circ, 22.5^\circ]$ .
- **Global scaling.** Without changing the images, the camera poses and 3D box annotations are scaled relative to the origin of the global BEV space. The scaling factor is uniformly sampled from  $[0.95, 1.05]$ .

During testing, no random augmentations are used. The images are resized to the final width while keeping the aspect ratio, and cropped at the bottom-center.

## References

- [1] Tianqi Chen, Bing Xu, Chiyuan Zhang, and Carlos Guestrin. Training deep nets with sublinear memory cost. *arXiv preprint arXiv:1604.06174*, 2016. 1
- [2] MMCV Contributors. MMCV: OpenMMLab computer vision foundation. <https://github.com/open-mmlab/mmcv>, 2018. 1
- [3] Kaiming He, Xiangyu Zhang, Shaoqing Ren, and Jian Sun. Deep residual learning for image recognition. In *Proceedings of the IEEE conference on computer vision and pattern recognition*, pages 770–778, 2016. 1

- [4] Junjie Huang and Guan Huang. Bevdet4d: Exploit temporal cues in multi-camera 3d object detection. *arXiv preprint arXiv:2203.17054*, 2022. 1
- [5] Youngwan Lee and Jongyoul Park. Centermask: Real-time anchor-free instance segmentation. In *Proceedings of the IEEE/CVF conference on computer vision and pattern recognition*, pages 13906–13915, 2020. 1
- [6] Yingfei Liu, Tiancai Wang, Xiangyu Zhang, and Jian Sun. Petr: Position embedding transformation for multi-view 3d object detection. *arXiv preprint arXiv:2203.05625*, 2022. 1
- [7] Yingfei Liu, Junjie Yan, Fan Jia, Shuailin Li, Qi Gao, Tiancai Wang, Xiangyu Zhang, and Jian Sun. Petrv2: A unified framework for 3d perception from multi-camera images. *arXiv preprint arXiv:2206.01256*, 2022. 1
- [8] Ilya Loshchilov and Frank Hutter. Decoupled weight decay regularization. *arXiv preprint arXiv:1711.05101*, 2017. 1
- [9] Dennis Park, Rares Ambrus, Vitor Guizilini, Jie Li, and Adrien Gaidon. Is pseudo-lidar needed for monocular 3d object detection? In *Proceedings of the IEEE/CVF International Conference on Computer Vision*, pages 3142–3152, 2021. 1
- [10] Yue Wang, Vitor Campagnolo Guizilini, Tianyuan Zhang, Yilun Wang, Hang Zhao, and Justin Solomon. Detr3d: 3d object detection from multi-view images via 3d-to-2d queries. In *Conference on Robot Learning*, pages 180–191. PMLR, 2022. 1
